# Supplementary material for: Highly electrocatalytic three-dimensional chain-like nickel-based electrocatalysts with hierarchical structures for hydrogen evolution reactions
Source: Royal Society of Chemistry journal article supplement (doi:10.1039/d1dt02465e), 2021-01-01
Supplement: d1dt02465e1.pdf [file d1dt02465e1.pdf]

## Supporting information

### **Three-dimensional chain-like nickel-based electrocatalyst with hierarchical structure as highly electrocatalyst for hydrogen evolution reaction**

*Denghe Gao,<sup>a</sup> Shan Ji,<sup>\*b</sup> Hui Wang,<sup>a</sup> Xuyun Wang,<sup>a</sup> Yong Liu,<sup>c</sup> Rongfang Wang<sup>\*\*a</sup>*

<sup>a</sup> State Key Laboratory Base for Eco-Chemical Engineering, College of Chemical Engineering, Qingdao University of Science and Technology, Qingdao, 266042, China

<sup>b</sup> College of Biological, Chemical Science and Engineering, Jiaxing University, Jiaxing, 314001, China

<sup>c</sup> Shandong Hydrogen Energy CO., Ltd, Weifang, 261000, China

#### **Physical characterization**

Scanning electron micrographs (SEM) images were taken on JSM-6330F microscope. Transmission electron microscope (TEM) was performed on a JEOL JEM-2000 FX instrument operated at 200 kV. Energy dispersive spectroscopy (EDS) was used to determine elemental composition. VG Escalab210 spectrometer fitted with Mg 300 W X-ray source was used to get the X-ray photoelectron spectra (XPS). X-ray diffraction was done on Shimadzu XDe3A equipped with Cu-K $\alpha$  radiation ( $\lambda = 0.15418$  nm).

#### **Electrochemical characterizations**

The electrocatalytic properties of as-prepared electrodes were evaluated in a three electrode cell, which was connected to electrochemical workstation (CHI650D, CH Instruments). In the three-electrode cell, the as-prepared electrode (size:  $1 \times 1$  cm<sup>2</sup>) was used as working electrode, graphitic rod as counter electrode, Hg/HgO (1 M KOH) as reference electrode, and 1 M KOH as the electrolyte. All potentials were normalized

to the reversible hydrogen electrode by the equation:  $E_{\text{RHE}} = E_{\text{Hg/HgO}} + 0.059 \text{ pH} + 0.14 \text{ V}$ .  $iR$  compensation was applied to all the electrochemical tests,  $iR=90\%$ .

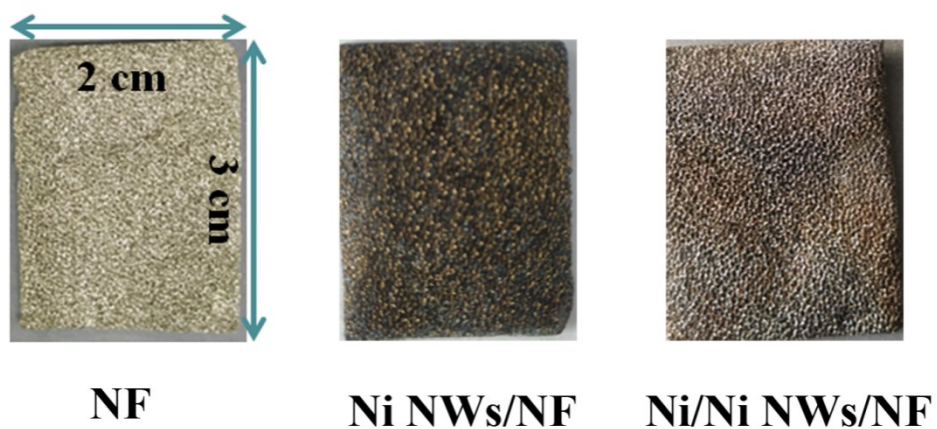

**Figure S1.** Picture of NF, Ni NWs/NF, and Ni/Ni NWs/NF.

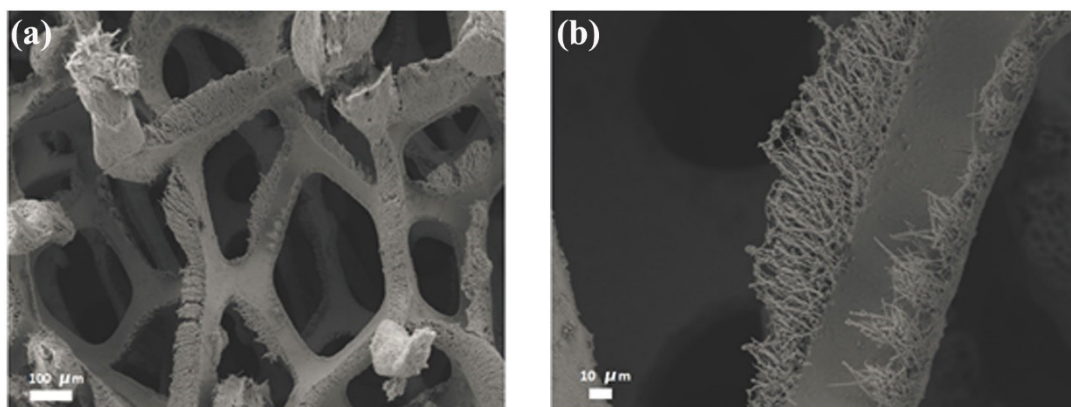

**Figure S2.** SEM picture of Ni NWs/NF.

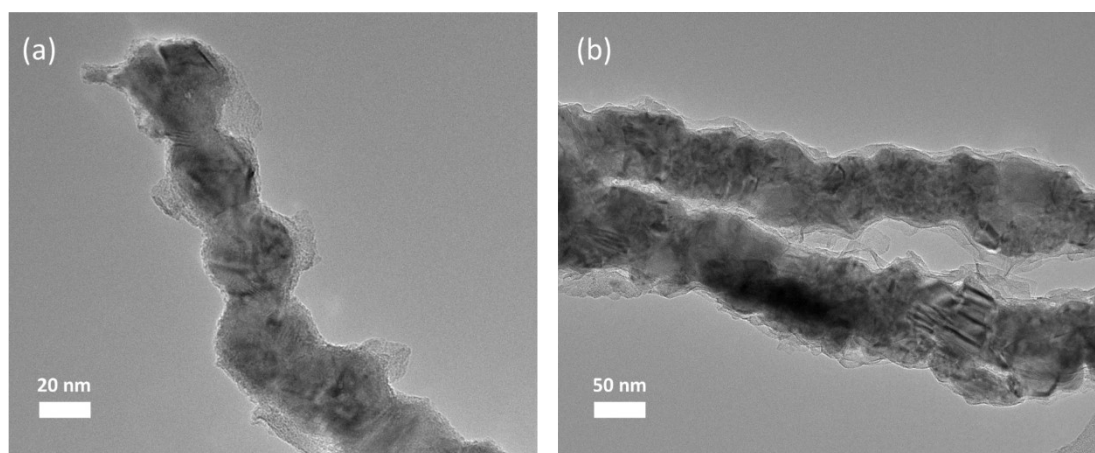

**Figure S3.** TEM picture of Ni NWs/NF.

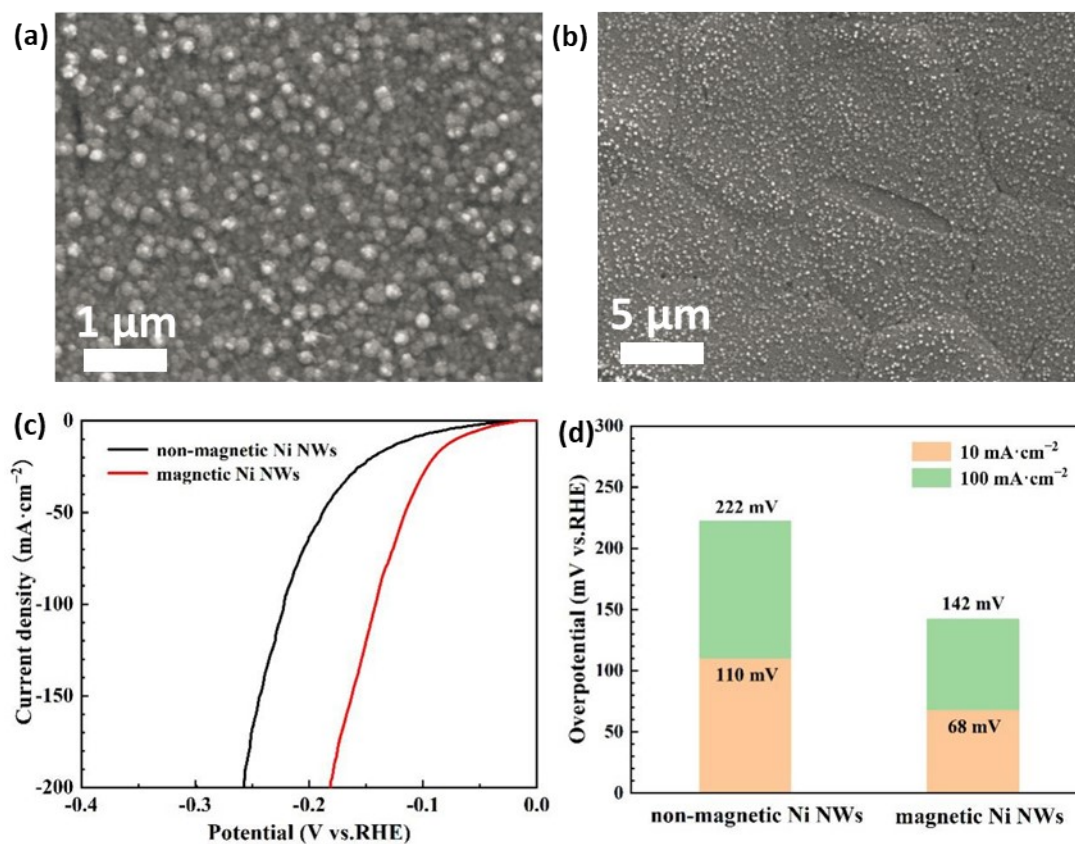

**Figure S4.** SEM picture of Ni NWs/NF samples prepared without a magnetic field (a) and (b); HER LSV curves of Ni NWs/NF samples prepared with or without a magnetic field (c) and (d).

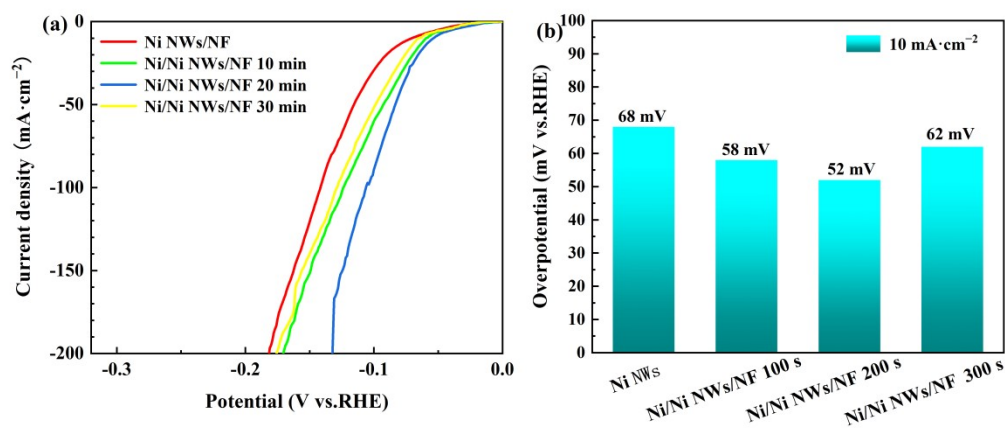

**Figure S5.** HER LSV curves of the Ni/Ni NWs/NF samples prepared with different electrodeposition times

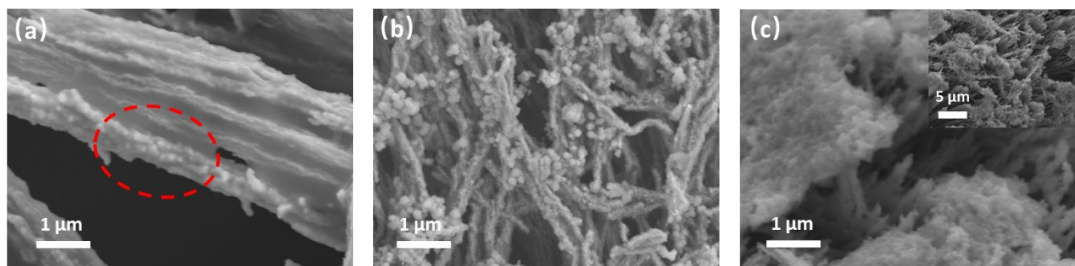

**Figure S6.** SEM picture of the Ni/Ni NWs/NF samples prepared with different electrodeposition times (a) 10 min, (b) 20 min, (c) 30 min.

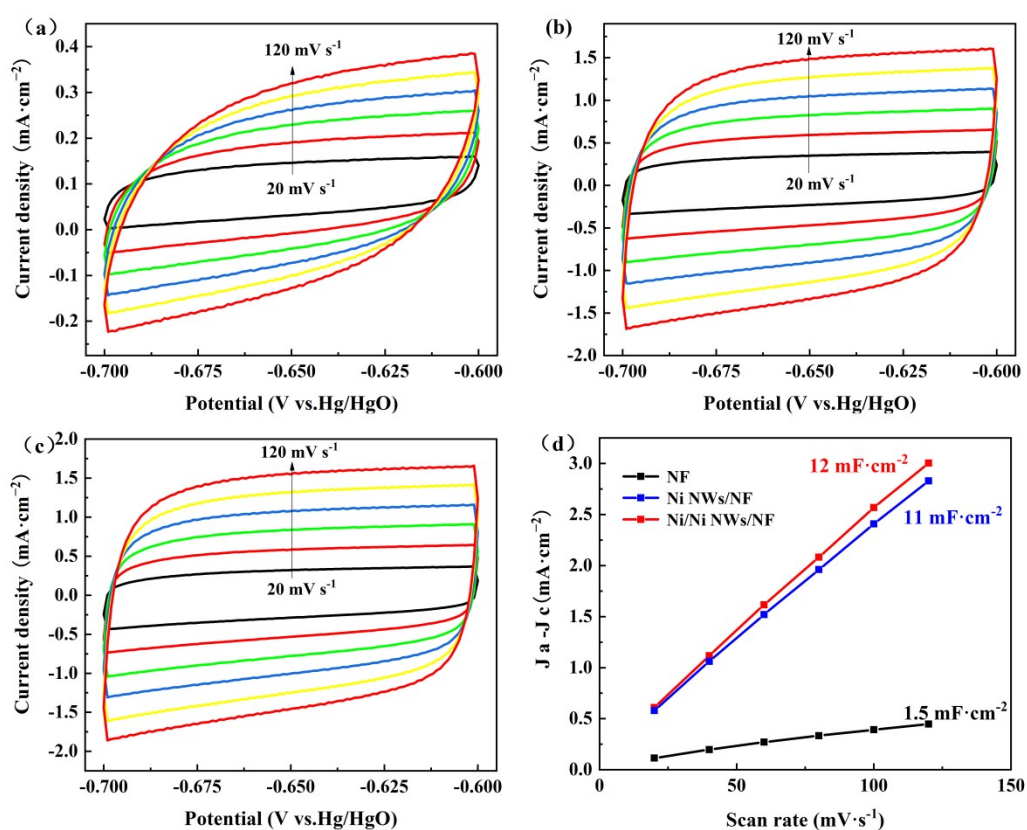

**Figure S7.** Cyclic Voltammetry plots of (a) NF; (b) Ni NWs/NF; (c) Ni/Ni NWs/NF; (d) linear fitting of HER  $\Delta j$  vs. scan rates at +0.316 V vs. RHE

**Table S1.** Fitting values of Pt/C, Ni/ Ni NWs/NF, Ni NWs/NF, Ni/NF, NF electrochemical composition in Nyquist

| Samples       | R <sub>s</sub> (ohm) | R <sub>ct</sub> (ohm) |
|---------------|----------------------|-----------------------|
| Pt/C          | 0.9548               | 0.20635               |
| Ni/ Ni NWs/NF | 0.90878              | 1.007                 |
| Ni NWs/NF     | 0.9225               | 1.321                 |
| Ni/NF         | 0.9695               | 39.43                 |
| NF            | 0.90732              | 57.54                 |

**Table S2.** Comparison of HER activities of various catalysts

| Catalyst                                                 | Electrolyte                                        | Substrate             | $\eta_{10}$ (mV) | Reference        |
|----------------------------------------------------------|----------------------------------------------------|-----------------------|------------------|------------------|
| Ni/ Ni NWs/NF                                            | <b>1 M KOH</b>                                     | Ni foam               | 52               | <b>This work</b> |
| Ni–Ni(OH) <sub>2</sub>                                   | <b>1 M KOH</b>                                     | Cu foam               | 57               | 1                |
| Ni <sub>3</sub> N–V <sub>2</sub> O <sub>3</sub>          | <b>1 M KOH</b>                                     | Ni foam               | 57               | 2                |
| NiP <sub>2</sub> /NiSe <sub>2</sub>                      | <b>1 M KOH</b>                                     | carbon fiber<br>cloth | 100              | 3                |
| Ni <sup>III</sup> Co <sup>II</sup> Fe–O@NF               | <b>1 M KOH</b>                                     | Ni foam               | 58               | 4                |
| Co <sub>0.9</sub> Ni <sub>0.1</sub> Se with<br>vacancies | <b>0.5 M</b><br><b>H<sub>2</sub>SO<sub>4</sub></b> | -                     | 185.7            | 5                |
| NiCoFeP                                                  | <b>1 M KOH</b>                                     | -                     | 131              | 6                |
| Ni–WSe <sub>2</sub>                                      | <b>0.5 M KOH</b>                                   | -                     | 215              | 7                |
| Fe-doped NiS <sub>2</sub>                                | <b>0.5 M</b><br><b>H<sub>2</sub>SO<sub>4</sub></b> | -                     | 198              | 8                |
| MoS <sub>2</sub> /Ni <sub>2</sub> O <sub>3</sub> H       | <b>1 M KOH</b>                                     | carbon fiber<br>paper | 84               | 9                |
| CoS Ni P                                                 | <b>0.5 M</b><br><b>H<sub>2</sub>SO<sub>4</sub></b> | Ni foam               | 41               | 10               |
| MoO <sub>3</sub> /Ni–NiO                                 | <b>1 M KOH</b>                                     | carbon cloth          | 62               | 11               |

|                                                           |                                              |              |      |    |
|-----------------------------------------------------------|----------------------------------------------|--------------|------|----|
| NiCu/C                                                    | <b>0.5 M<br/>H<sub>2</sub>SO<sub>4</sub></b> | Tissue paper | 184  | 12 |
| MoO <sub>2</sub> -Ni<br>NWs/NF                            | <b>1 M KOH</b>                               | Ni foam      | 58.4 | 13 |
| $\alpha$ -Ni(OH) <sub>2</sub><br>•0.75H <sub>2</sub> O/NF | <b>1 M KOH</b>                               | Ni foam      | 26   | 14 |
| Ru/c-Ti <sub>3</sub> C <sub>2</sub> T <sub>x</sub> /NF    | <b>1 M KOH</b>                               | Ni foam      | 37   | 15 |

## Reference

1. J. Hu, S. Li, Y. Li, J. Wang, Y. Du, Z. Li, X. Han, J. Sun and P. Xu, *J. Mater. Chem. A*, 2020, **8**, 23323-23329.
2. P. Zhou, G. Zhai, X. Lv, Y. Liu, Z. Wang, P. Wang, Z. Zheng, H. Cheng, Y. Dai and B. Huang, *Appl. Catal., B*, 2021, **283**, 119590-119599.
3. L. Yang, L. Huang, Y. Yao and L. Jiao, *Appl. Catal., B*, 2021, **282**, 119584-119592.
4. Z. Wang, P. Guo, S. Cao, H. Chen, S. Zhou, H. Liu, H. Wang, J. Zhang, S. Liu, S. Wei, D. Sun and X. Lu, *Appl. Catal., B*, 2021, **284**, 119725-119735.
5. W. Zhong, Z. Wang, N. Gao, L. Huang, Z. Lin, Y. Liu, F. Meng, J. Deng, S. Jin, Q. Zhang and L. Gu, *Angew. Chem. Int. Ed.*, 2020, **59**, 22743-22748.
6. Y. Guo, J. Tang, Z. Wang, Y. Sugahara and Y. Yamauchi, *Small*, 2018, **14**, 1802442-1802450.
7. S. R. Kadam, A. N. Enyashin, L. Houben, R. Bar-Ziv and M. Bar-Sadan, *J. Mater. Chem. A*, 2020, **8**, 1403-1416.
8. T. Wang, X. Guo, J. Zhang, W. Xiao, P. Xi, S. Peng and D. Gao, *J. Mater. Chem. A*, 2019, **7**, 4971-4976.
9. J. Hu, C. Zhang, Y. Zhang, B. Yang, Q. Qi, M. Sun, F. Zi, M. K. H. Leung and B. Huang, *Small*, 2020, **16**, 2002212-2002221.
10. J. Sun, M. Ren, L. Yu, Z. Yang, L. Xie, F. Tian, Y. Yu, Z. Ren, S. Chen and H. Zhou, *Small*, 2019, **15**, 1804272-1804279.
11. X. Li, Y. Wang, J. Wang, Y. Da, J. Zhang, L. Li, C. Zhong, Y. Deng, X. Han and W. Hu, *Adv. Mater.* 2020, **32**, 2003414-2003424.
12. M. A. Ahsan, A. R. Puente Santiago, Y. Hong, N. Zhang, M. Cano, E. Rodriguez-Castellon, L. Echegoyen, S. T. Sreenivasan and J. C. Noveron, *J. Am. Chem. Soc.*, 2020, **142**, 14688-14701.
13. X. Liu, K. Ni, C. Niu, R. Guo, W. Xi, Z. Wang, J. Meng, J. Li, Y. Zhu, P. Wu, Q. Li, J. Luo, X. Wu and L. Mai, *ACS Catal.*, 2019, **9**, 2275-2285.
14. K. Yao, M. Zhai and Y. Ni, *Electrochim. Acta*, 2019, **301**, 87-96.
15. A. Kong, M. Peng, H. Gu, S. Zhao, Y. Lv, M. Liu, Y. Sun, S. Dai, Y. Fu, J. Zhang and W. Li, *Chem. Eng. J.*, 2021, **426**, 131234-131243.
